# Supplementary material for: Bioconjugation of Carbohydrates to Gelatin Sponges Promoting 3D Cell Cultures
Source: MDPI journal article supplement (doi:10.3390/biomimetics8020193), 2023-05-06
Supplement: s1 [file s1]

## **Supplementary Information**

### **Bioconjugation of Carbohydrates to Gelatin Sponges Promoting 3D Cell Cultures**

**Antonietta Pepe <sup>1,\*</sup>, Antonio Laezza <sup>1</sup>, Angela Ostuni <sup>2</sup>, Alessandra Scelsi <sup>1</sup>, Alessandro Laurita <sup>3</sup> and  
Brigida Bochicchio <sup>1,\*</sup>**

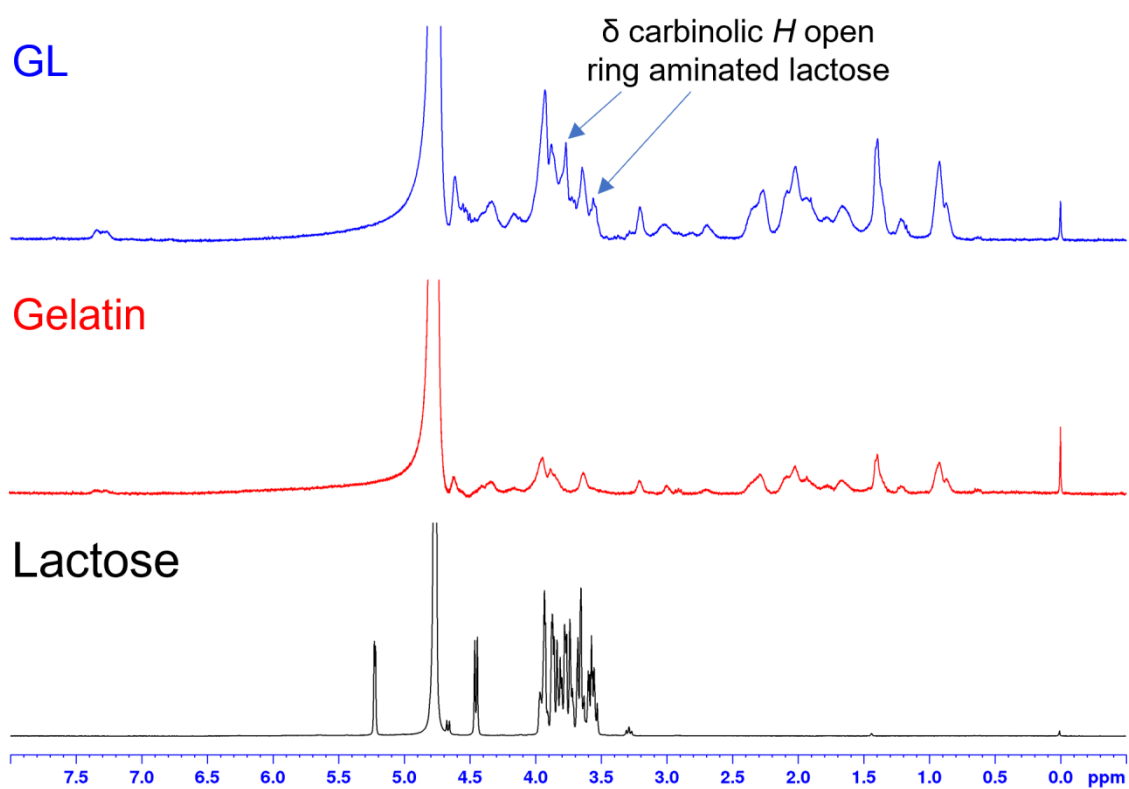

**Figure S1. Characterization of gelatin derivatives by  $^1\text{H}$  NMR spectra recorded in  $\text{D}_2\text{O}$  at 289 K.**  $^1\text{H}$  NMR spectra of lactose (black curve), gelatin (red curve) and GL (blue curve).

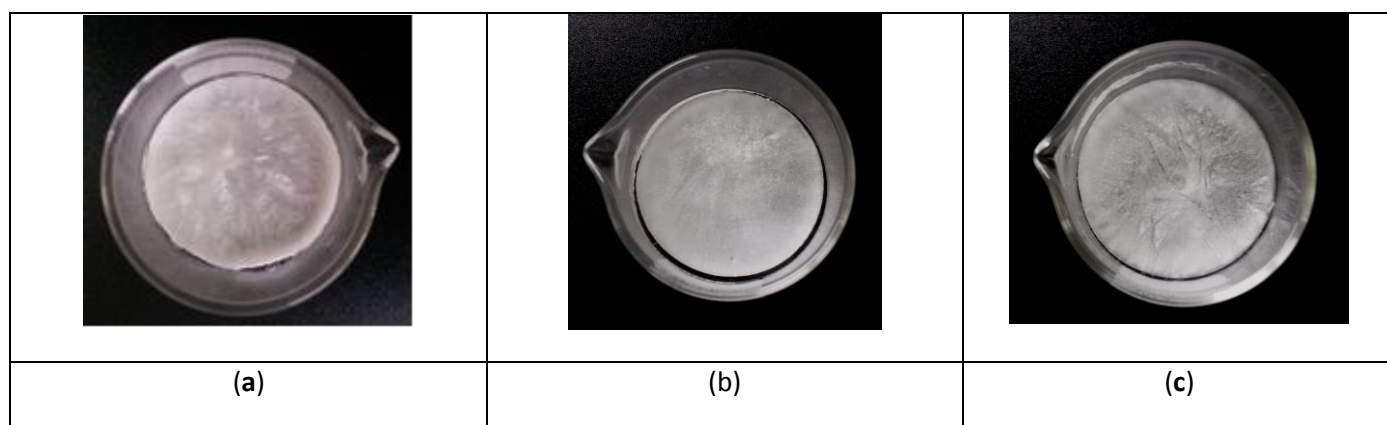

**Figure S2.** Images of the GS (a), GS-M (b) and GS-L (c) sponges after freeze-drying.

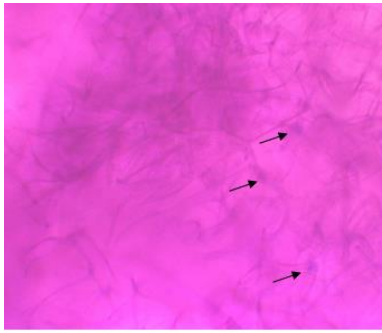

GS-x

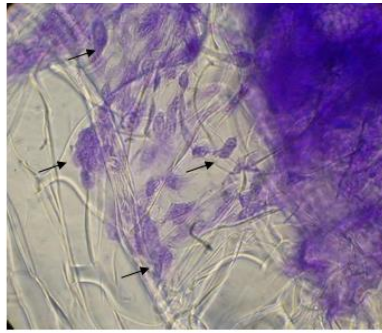

GS-Lx

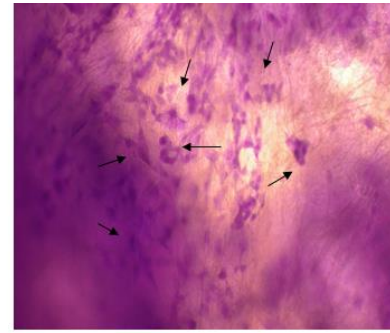

GS-Mx

**Figure S3.** Microscope images of HepG2 cells grown on GS-x, GS-Lx, and GS-Mx sponges for 13 days, stained with crystal violet. Arrows indicate cells.
